# Supplementary material for: Stevia Polyphenols, Their Antimicrobial and Anti-Inflammatory Properties, and Inhibitory Effect on Digestive Enzymes
Source: MDPI journal article supplement (doi:10.3390/molecules28227572), 2023-11-13
Supplement: s1 [file s1]

## Supporting Material

# **Stevia Polyphenols, Their Antimicrobial and Anti-Inflammatory Properties, and Inhibitory Effect on Digestive Enzymes**

Khaing Zar Myint 1,2, Zhuoyu Zhou 1,2, Qiandai Shi 1,2, Junming Chen 1, Xinyu Dong 1 and Yongmei Xia 1,2,\*

1        State Key Laboratory of Food Science and Resource, Jiangnan University, 1800 Lihu Avenue, Wuxi 214122, China; 7170610901@stu.jiangnan.edu.cn (K.Z.M.); 7200610016@stu.jiangnan.edu.cn (Z.Z.); 7220610005@stu.jiangnan.edu.cn (Q.S.); 7150610008@stu.jiangnan.edu.cn (J.C.); 6200612041@stu.jiangnan.edu.cn (X.D.)

2        Key Laboratory of Synthetic and Biological Colloids (Ministry of Education), School of Chemical and Materials Engineering, Jiangnan University, 1800 Lihu Avenue, Wuxi 214122, China

\*        Correspondence: ymxia@jiangnan.edu.cn

## The Main components and polyphenols in the PPS

There are more than 39 phenolic compounds in *stevia rebaudiana* (bertoni) have been disclosed. In this experiment, seven phenolic compounds (chlorogenic acid, isochlorogenic acid A, B, C, cryptochlorogenic acid, neochlorogenic acid, and quercetin) were observed in the **assayed** PPS as main components (Table S1, Figure S1).

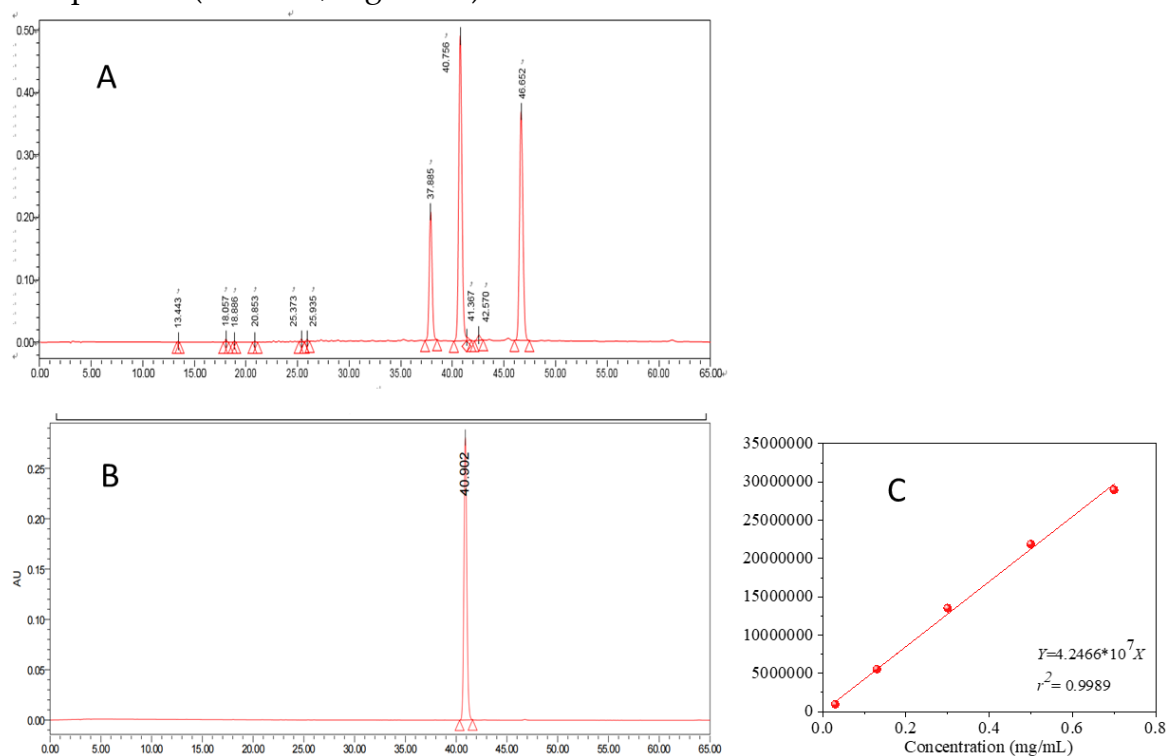

**Figure S1.** Vendor provided HPLC profile of the PPS (A), Isochlorogenic acid A (B) and calibration of Isochlorogenic acid A (C). Isochlorogenic acid A was used as the standard to determine the content of other polyphenols. The conversion factors (f) of HPLC peak area ( $A_i$ ) of each polyphenol over that of isochlorogenic acid A ( $A_0$ ) are as follows ( $f = A_i / A_0$ ): Neochlorogenic acid: 0.69; Chlorogenic acid: 0.69; Cryptochlorogenic acid: 0.69; Isochlorogenic acid B: 1.0; Quercitrin: 0.87; Isochlorogenic acid C: 1.0.

**Table S1.** The composition of the PPS sample from *Stevia rebaudiana* Bertoni leaves

| Composition            | Contents (wt.%, HPLC)[1] | Retention time (min) |
|------------------------|--------------------------|----------------------|
| Neochlorogenic acid    | 0.1                      | 13.443               |
| Chlorogenic acid       | 0.48                     | 18.057               |
| Cryptochlorogenic acid | 0.10                     | 18.886               |
| Caffeic acid           | 0                        | -                    |
| Galuteolin             | 0                        | -                    |
| Isochlorogenic acid A  | 26.18                    | 40.756               |
| Isochlorogenic acid B  | 6.59                     | 37.885               |
| Isochlorogenic acid C  | 21.26                    | 46.652               |
| Quercetin              | 0.01                     | 41.367               |
| Protein                | 0.82                     |                      |
| Total flavonoid        | 0.44                     |                      |
| Polysaccharide         | 31.64                    |                      |
| Water                  | 4.5                      |                      |

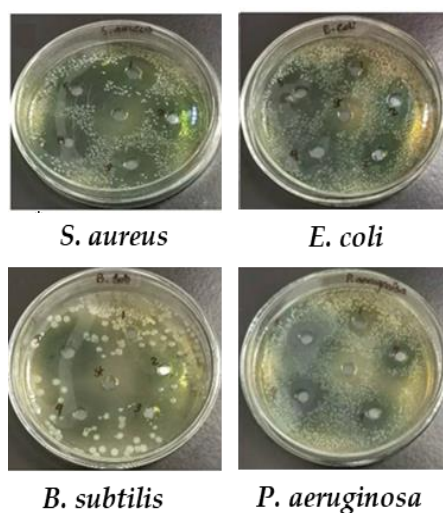

**Figure S2.** Antibacterial activity of the PPS against *P. aeruginosa*, *E. coli*, *B. subtilis* and *S. aureus*.

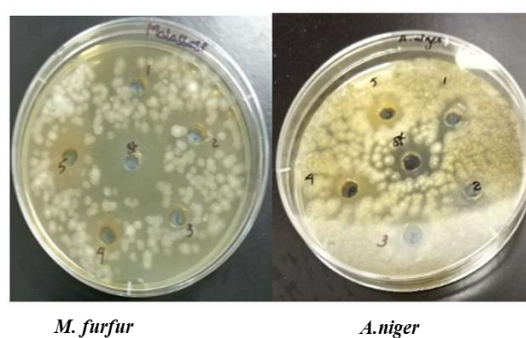

**Figure S3.** Antifungal activity of the PPS against *M. furfur* and *A. niger*.

1. Myint, K. z.; Zhou, Z.; Xia, Y.; Fang, Y.; Wu, M.; Zhu, S.; Shen, J., Stevia polyphenols: A stable antioxidant that presents a synergistic effect with vitamin C. *J. Food Process. Preserv.* **2021**, 45, (4), e15317.
